# Supplementary material for: Prevalence and determinants of miscarriage in Bangladesh: a trimester specific analysis
Source: Research Square preprint supplement (doi:10.21203/rs.3.rs-8507386/v1), 2026-02-21
Supplement: Supplementary file 1 [file 233fd5f9541e6f5f81824bf2.docx]

***Supplementary Table 1: Multicollinearity test result***

| ***Covariates*** | ***Collinearity Statistics*** | |
| --- | --- | --- |
| ***Tolerance*** | ***VIF*** |
| Division | 0.97551 | 1.025105 |
| Residence | 0.840977 | 1.189092 |
| Wealth Index | 0.662998 | 1.508301 |
| Age Group | 0.753169 | 1.327723 |
| Working Status | 0.948561 | 1.054228 |
| Educational Attainment | 0.648662 | 1.541634 |
| Age at first birth | 0.854218 | 1.170661 |
| Pregnancy Termination History | 0.40385 | 2.476168 |
| Birth Interval | 0.734983 | 1.360575 |
| Contraceptive Use | 0.811784 | 1.231855 |
| Pregnancy Order | 0.195975 | 5.102699 |
| Unintended Pregnancy | 0.986591 | 1.013591 |
| Husband’s Educational Attainment | 0.617159 | 1.620329 |
